# Supplementary material for: Transcriptome analysis of Oral Squamous Cell Carcinoma Utilizing Expression Datasets of Middle-aged Indian Males
Source: Research Square preprint supplement (doi:10.21203/rs.3.rs-4936223/v1), 2024-09-17
Supplement: Supplementary file 1 [file 3898cefa36d66c35ce554b51.docx]

**SUPPLEMENTARY DATA**

**Transcriptome analysis of Oral Squamous Cell Carcinoma Utilizing Expression Datasets of Middle-aged Indian Males**

**Anuraj Nayarisseri1, 2, *,Niyati Bisht1, Srinivas Bandaru3, Srushti Kunsavalikar1, Durvi Bhati1, Abhishek Kumar1, Rinku chaudhary1, Arshiya Khan1, Khushboo Sharma1, Sanjeev Kumar Singh4,***

1. *In silico* Research Laboratory, Eminent Biosciences, 91-A, Sector-A, Mahalakshmi Nagar, Indore-452010, Madhya Pradesh, India

2. Bioinformatics Research Laboratory, LeGene Biosciences Pvt Ltd, 91-A, Sector-A, Mahalakshmi Nagar, Indore-452010, Madhya Pradesh, India

3 Department of Biotechnology, Koneru Lakshmiah Educational Foundation (KLEF), 11 Green Fields, Vaddeswaram, Andhra Pradesh 522302.

4. Computer Aided Drug Design and Molecular Modelling Lab, Department of Bioinformatics, Alagappa University, Karaikudi - 630003, Tamil Nadu, India.

*Authors for communication email: [anuraj@eminentbio.com](mailto:anuraj@eminentbio.com), [skysanjeev@gmail.com](mailto:skysanjeev@gmail.com)

**Corresponding authors**

**1. Dr. Anuraj Nayarisseri**

Affiliation 1: *In silico* Research Laboratory, Eminent Biosciences, Indore – 452 010, Madhya Pradesh, India.

Affiliation 2: Computer Aided Drug Design and Molecular Modelling Lab, Department of Bioinformatics, Alagappa University, Karaikudi - 630003, Tamil Nadu, India.

Email: anuraj@eminentbio.com

Tel: +91 9752295342

ORCID: <http://orcid.org/0000-0003-2567-9630>

**2. Dr. Sanjeev Kumar Singh**

Designation: Professor

Affiliation: Computer Aided Drug Design and Molecular Modelling Lab, Department of Bioinformatics, Alagappa University, Karaikudi - 630003, Tamil Nadu, India.

Tel: +91-9894429800

E-mail: [skysanjeev@gmail.com](mailto:skysanjeev@gmail.com)

ORCID: <http://orcid.org/0000-0003-4153-6437>

**Table S1.** Details about Sequence Archive Run (SRR) according to the accession numbers with sequencing data (The tumor samples are highlighted)

| **Run** | **Age** | **Average**  **spot length** | **Bases-giga**  **basepairs** | **Isolate** | **Tissue** | **Date**  **Published** | **Access**  **type** |
| --- | --- | --- | --- | --- | --- | --- | --- |
| SRR19894447 | 45 | 269 | 1.55Gbp | ZTX45_2020 | Normal | 2022-06-29 | Public |
| SRR19894448 | 45 | 281 | 1.19Gbp | ZNT45_2020 | Normal | 2022-06-29 | Public |
| SRR19894449 | 39 | 280 | 1.77Gbp | ZTX43_2020 | Tumor | 2022-06-29 | Public |
| SRR19894450 | 39 | 284 | 1.45Gbp | ZNT43_2020 | Normal | 2022-06-29 | Public |
| SRR19894451 | 48 | 283 | 1.25Gbp | ZTX58_2021 | Tumor | 2022-06-29 | Public |
| SRR19894452 | 48 | 279 | 1.72Gbp | ZNT58_2021 | Normal | 2022-06-29 | Public |
| SRR19894453 | 37 | 285 | 1.73Gbp | ZTX40_2020 | Tumor | 2022-06-29 | Public |
| SRR19894454 | 37 | 280 | 1.93Gbp | ZNT40_2020 | Normal | 2022-06-29 | Public |

**Quality check**

For quality check, the FastQC format provided a rapid assessment of the read quality, encompassing various features such as sequence quality, N content, GC content, adapter contamination, duplication levels, and statistical information. An overview of the FastQC results is shown in Table II.

**Table S2. Overview of the FastQC results.** The table summarizes the total sequences, per base sequence quality, sequence GC content, and per base N-content (The highlighted ones are the tumor samples)

| **Run** | **Basic statistics**  **(Total sequence)** | **Per-base-sequence quality** | **Sequence-GC content (%)** | **Per-base-N content** |
| --- | --- | --- | --- | --- |
| SRR19894447 | 5743048 | 28-40 | 55 | Nil |
| SRR19894448 | 4213119 | 28-40 | 54 | Nil |
| SRR19894449 | 6318879 | 30-40 | 54 | Nil |
| SRR19894450 | 511476 5 | 30-40 | 52 | Nil |
| SRR19894451 | 4389821 | 32-40 | 53-54 | Nil |
| SRR19894452 | 6161269 | 32-40 | 54 | Nil |
| SRR19894453 | 6064421 | 32-40 | 54-55 | Nil |
| SRR19894454 | 6876009 | 32-40 | 53-54 | Nil |


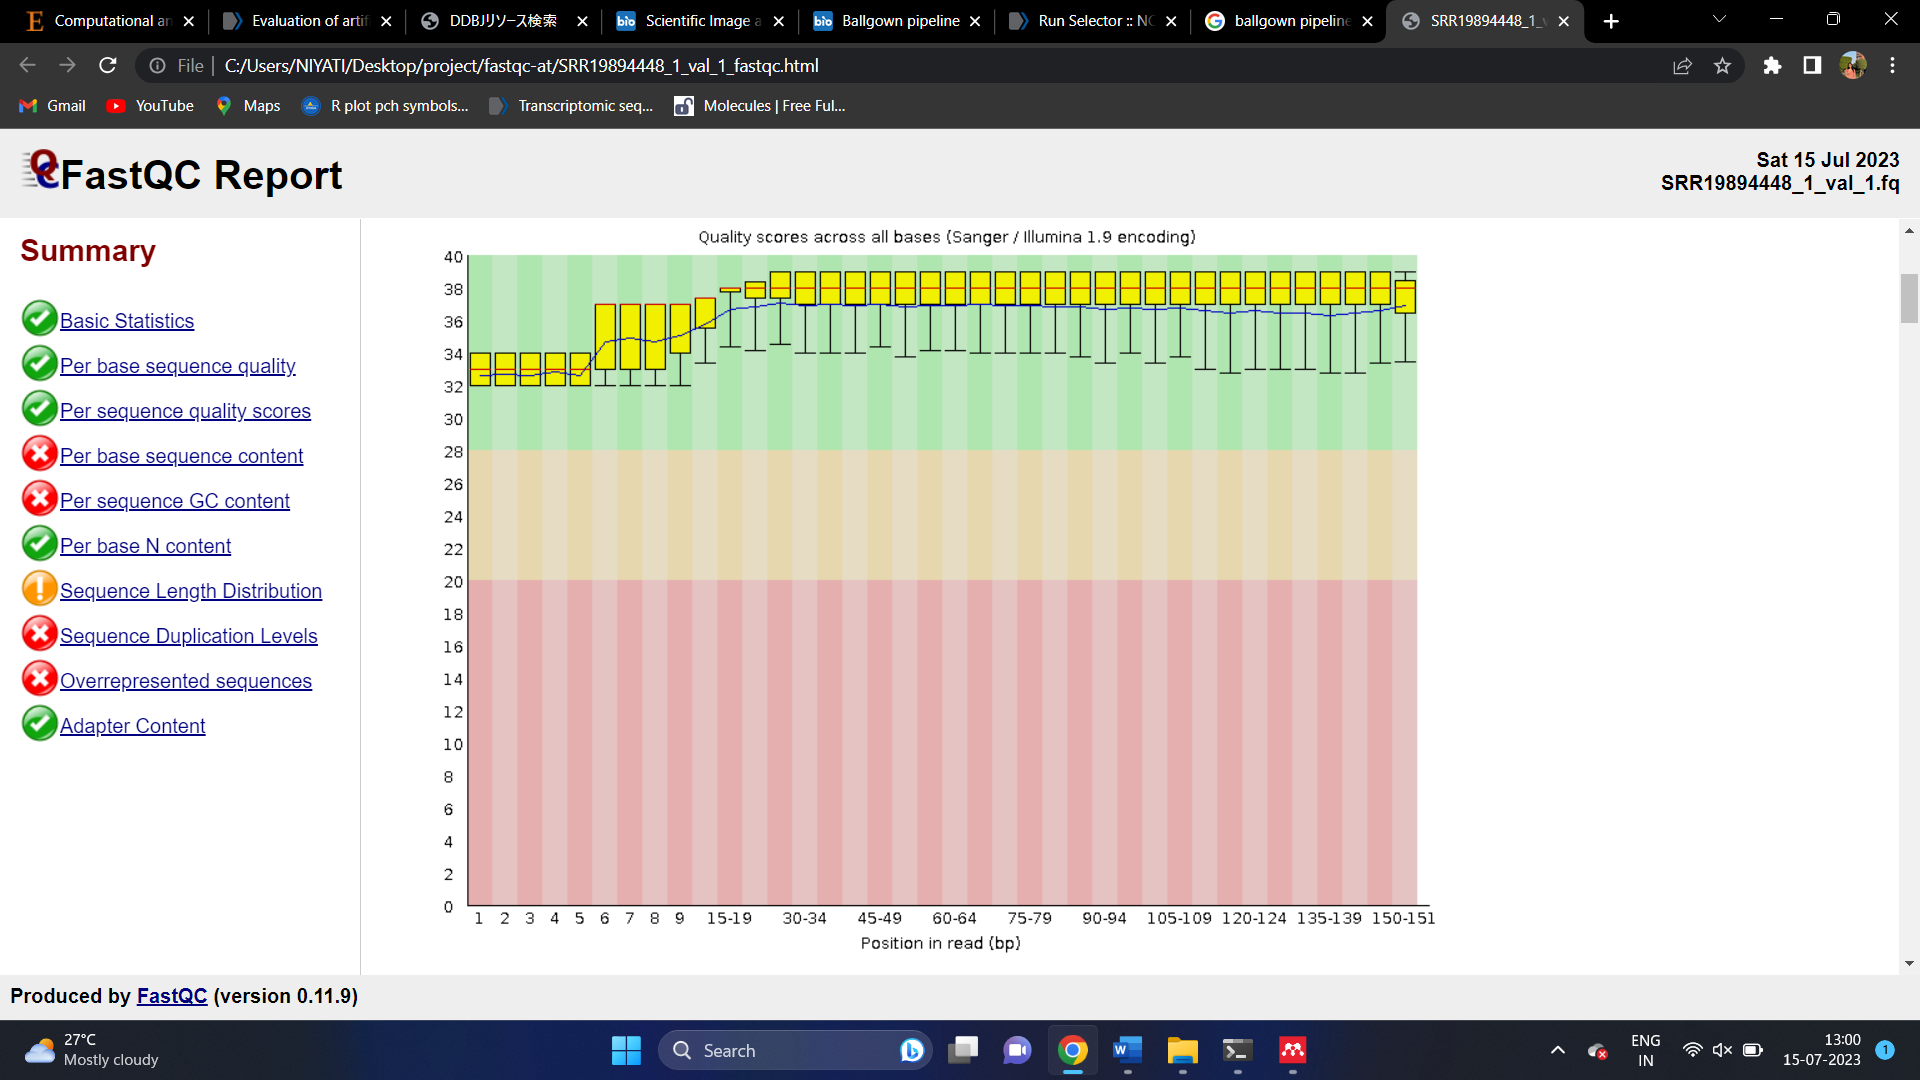


**Figure S1. Post-trimming FastQC report.** The trimming of the read was performed by TrimGaloresoftware, and the quality check can be done post-trimming. All the reads have a quality score of more than 30 and the reads less than 30 were trimmed.

**Read the Alignment and Assembly of Transcripts**

For read alignment in transcriptome reconstruction, the HISAT2 software was used. The alignment of reads to the reference genome is a critical step in the protocol, as it establishes the correspondence between the reads and the genomic regions. The read alignment to the human genome resulted in the generation of SAM (Sequence Alignment Map) files, with an alignment rate of more than 80%. The SAM files were converted to BAM (Binary Alignment Map) format to facilitate further analysis. Subsequently, the BAM files were indexed using samtools. Transcriptome reconstruction was performed using StringTie, which generated annotation files containing the expression levels of all the genes and transcripts of interest. These annotation files provide valuable insights into the gene expression profiles for the samples.

**Table S3. Biologically significant genes related to oral squamous cell carcinoma**

| **Gene names** | **Gene IDs** | **fc** | **pval** | **qval** |
| --- | --- | --- | --- | --- |
| *P3H4* | MSTRG.13675 | 3.29144 | 7.76E-09 | 0.000139 |
| *PROS1* | MSTRG.22024 | 0.151577 | 3.48E-07 | 0.002907 |
| *DECR1* | MSTRG.30065 | 3.564668 | 4.86E-07 | 0.002907 |
| *PGLYRP4* | MSTRG.2025 | 5.074722 | 7.88E-06 | 0.024339 |
| *KIFAP3* | MSTRG.2374 | 5.255649 | 8.59E-06 | 0.024339 |
| *CTBP1* | MSTRG.23131 | 0.294249 | 9.49E-06 | 0.024339 |
| *GUCY1B1* | MSTRG.24230 | 2.764809 | 1.56E-05 | 0.031184 |
| *MARK3* | MSTRG.9875 | 5.907903 | 2.24E-05 | 0.036597 |
| *MMD* | MSTRG.14033 | 2.982113 | 2.70E-05 | 0.040373 |
| *PSPHP1* | MSTRG.28276 | 3.132662 | 3.05E-05 | 0.041878 |
| *RPF2* | MSTRG.27234 | 4.631748 | 3.34E-05 | 0.041878 |
| *CERS4* | MSTRG.15538 | 4.570087 | 3.50E-05 | 0.041878 |
| *CDK16* | MSTRG.32218 | 0.199631 | 4.35E-05 | 0.04879 |
| *STAT3* | MSTRG.13697 | 4.449902 | 4.85E-05 | 0.051165 |
| *RGS20* | MSTRG.29804 | 3.167032 | 5.88E-05 | 0.058585 |
| *TWF1* | MSTRG.6883 | 9.066633 | 6.46E-05 | 0.061021 |
| *FDPS* | MSTRG.2116 | 6.716559 | 6.94E-05 | 0.062288 |
| *KXD1* | MSTRG.15895 | 2.796901 | 7.90E-05 | 0.067467 |
| *NFIC* | MSTRG.15379 | 0.329525 | 0.000111 | 0.090839 |
| *PNN* | MSTRG.9105 | 0.449388 | 0.000138 | 0.104414 |
| *NEFL* | MSTRG.29582 | 4.283213 | 0.00014 | 0.104414 |
| *RPSA* | MSTRG.21533 | 20.25831 | 0.000159 | 0.109822 |
| *GDI2* | MSTRG.3264 | 3.812806 | 0.000194 | 0.128601 |
| *CLEC7A* | MSTRG.6561 | 5.92354 | 0.000206 | 0.132312 |
| *STAT3* | MSTRG.13697 | 3.099627 | 0.000218 | 0.13496 |
| *NT5C3A* | MSTRG.28110 | 0.245257 | 0.000236 | 0.138953 |
| *MAP3K13* | MSTRG.22906 | 2.175861 | 0.000242 | 0.138953 |
| *TRMT112* | MSTRG.5355 | 5.380821 | 0.000257 | 0.138953 |
| *CCDC167* | MSTRG.26719 | 2.567327 | 0.000261 | 0.138953 |
| *SUMF2* | MSTRG.28281 | 3.066449 | 0.000273 | 0.138953 |
| *PGAM5* | MSTRG.8076 | 3.48366 | 0.000279 | 0.138953 |
| *CHN1* | MSTRG.18529 | 2.834919 | 0.000287 | 0.139324 |
| *FAP* | MSTRG.18412 | 2.786988 | 0.000303 | 0.143157 |
| *CASP1* | MSTRG.5948 | 3.349881 | 0.000328 | 0.150204 |
| *PPP1R14B-AS1* | MSTRG.5350 | 3.077709 | 0.000335 | 0.150204 |
| *NYNRIN* | MSTRG.8946 | 0.391297 | 0.00035 | 0.15159 |
| *ERCC5* | MSTRG.8649 | 0.236914 | 0.000355 | 0.15159 |
| *RPS16* | MSTRG.16239 | 1.816302 | 0.000392 | 0.16006 |
| *KATNBL1* | MSTRG.10154 | 4.64907 | 0.000439 | 0.162799 |
| *TMEM40* | MSTRG.21280 | 4.540367 | 0.00044 | 0.162799 |
| *RPS21* | MSTRG.19961 | 2.37126 | 0.000451 | 0.162799 |
| *RIC8A* | MSTRG.4548 | 1.637453 | 0.000454 | 0.162799 |
| *RPL39P3* | MSTRG.27000 | 2.317107 | 0.000544 | 0.181436 |
| *ENTR1* | MSTRG.31777 | 2.740155 | 0.000548 | 0.181436 |
| *HMGN4* | MSTRG.26336 | 1.808148 | 0.000552 | 0.181436 |
| *RPA3* | MSTRG.27908 | 2.047178 | 0.00056 | 0.181436 |
| *GAS5* | MSTRG.2426 | 0.398619 | 0.000566 | 0.181436 |
| *KLK12* | MSTRG.16640 | 3.03424 | 0.000587 | 0.183303 |
| *EIF4EBP1* | MSTRG.29695 | 2.039047 | 0.000592 | 0.183303 |
| *DDIT4* | MSTRG.3850 | 3.747658 | 0.00063 | 0.18869 |
| *PCDHB14* | MSTRG.25587 | 2.267529 | 0.000636 | 0.18869 |
| *SCNN1D* | MSTRG.46 | 3.554325 | 0.000699 | 0.197098 |
| *EEF1E1* | MSTRG.26157 | 1.784998 | 0.000703 | 0.197098 |
| *ITGA1* | MSTRG.24736 | 2.166516 | 0.000764 | 0.210964 |
| *CXCL6* | MSTRG.23638 | 4.531233 | 0.000813 | 0.221047 |
| *DHRS9* | MSTRG.18461 | 9.183768 | 0.000896 | 0.229795 |
| *PTHLH* | MSTRG.6773 | 2.668392 | 0.000964 | 0.236663 |
